# Supplementary material for: Flood spatial coherence, triggers, and performance in hydrological simulations: large-sample evaluation of four streamflow-calibrated models
Source: Copernicus journal article supplement (doi:10.5194/hess-25-105-2021), 2021-01-06
Supplement: Supplementary file 1 [file hess-25-105-2021-supplement.pdf]

Supplement of Hydrol. Earth Syst. Sci., 25, 105–119, 2021  
<https://doi.org/10.5194/hess-25-105-2021-supplement>  
© Author(s) 2021. This work is distributed under  
the Creative Commons Attribution 4.0 License.

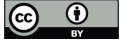

*Supplement of*

## **Flood spatial coherence, triggers, and performance in hydrological simulations: large-sample evaluation of four streamflow-calibrated models**

**Manuela I. Brunner et al.**

*Correspondence to:* Manuela I. Brunner ([manuelab@ucar.edu](mailto:manuelab@ucar.edu))

The copyright of individual parts of the supplement might differ from the CC BY 4.0 License.

# Supplementary Material

## Model illustrations

We provide illustrations of the model structures used in this work. Model schematics summarize the model states and fluxes. Schematics and equations use model-specific names as they are used in the model code. For clarity, these descriptions enforce that fluxes are shown in lower case and states in upper case. The model diagrams are based on:

- 5     – Snow17/SAC-SMA: analysis of the model’s description (National Weather Service NOAA, 2002): [https://www.nws.noaa.gov/oh/hrl/general/chps/Models/Sacramento\\_Soil\\_Moisture\\_Accounting.pdf](https://www.nws.noaa.gov/oh/hrl/general/chps/Models/Sacramento_Soil_Moisture_Accounting.pdf) and source code.
- TUW HBV: analysis of the model’s source code (Viglione and Parajka, 2020).
- VIC: descriptions of VIC in Melsen et al. (2018); Melsen and Guse (2019) and on analysis of the v4.1.2h source code (<https://github.com/UW-Hydro/VIC/releases/tag/VIC.4.1.2.h>).
- 10    – mHM: analysis of the model’s source code (<https://git.ufz.de/mhm/mhm/-/tree/5.7>) and a diagram provided in (Kumar et al., 2010).

## Snow17/SAC-SMA

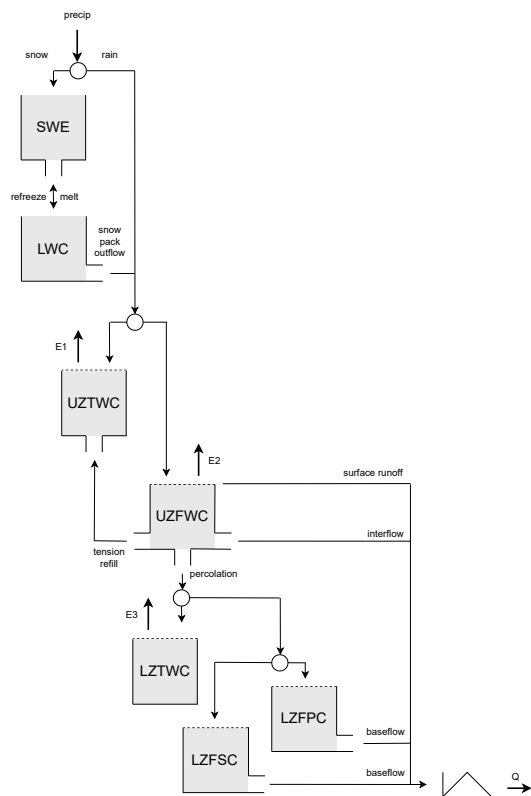

**Figure 1.** Structure of the Snow17/SAC-SMA model. Fluxes: precipitation (precip), snow, rain, snowmelt (melt), refreeze, snowpack outflow, evapotranspiration (E1, E2, and E3), tension refill, surface runoff, interflow percolation, baseflow, simulated discharge (Q). States: snow-water-equivalent (SWE), liquid water content (LWC), upper zone tension water contents (UZTWC), upper zone free water contents (UZFWC), lower zone tension water contents (LZTWC), lower zone free primary contents (LZFPC), lower zone free supplemental contents (LZFSC).

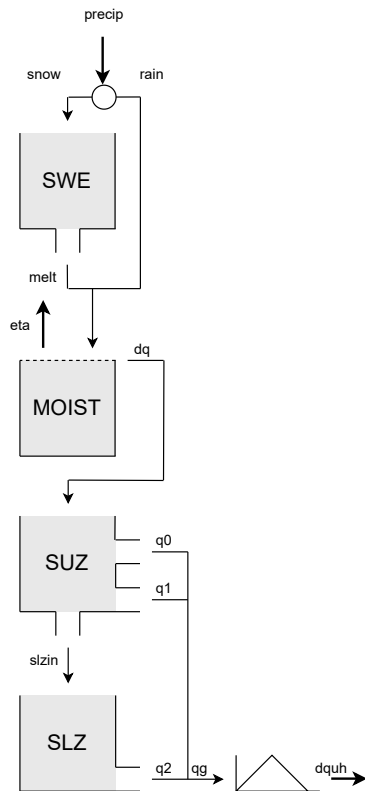

**Figure 2.** Structure of the TUW HBV model. Fluxes: precipitation (precip), snow, rain, snowmelt (melt), actual evapotranspiration (eta), runoff (dq), surface runoff (q0), subsurface runoff (q1), baseflow (q2), simulated runoff (qg), simulated discharge (dquh), input from upper to lower storage (slzin). States: snow-water-equivalent (SWE), soil moisture (MOIST), upper storage zone (SUZ), lower storage zone (SLZ).

# VIC

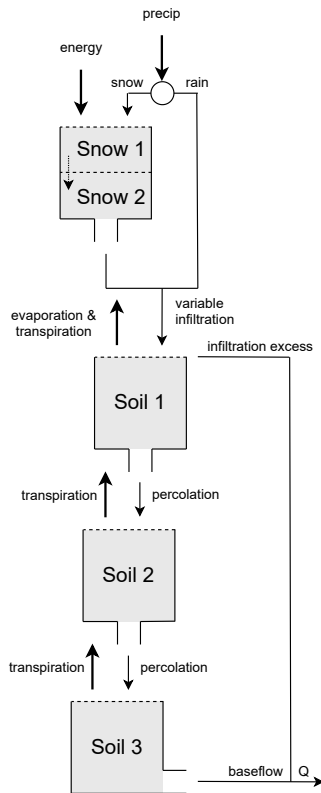

**Figure 3.** Fluxes: precipitation (precip), energy, snow, rain, variable infiltration, evaporation and transpiration, infiltration excess, baseflow, percolation, transpiration, simulated runoff (Q). Storage: snow layer 1 (Snow 1), snow layer 2 (Snow 2), soil layer 1 (Soil 1), soil layer 2 (Soil 2), soil layer 3 (Soil 3).

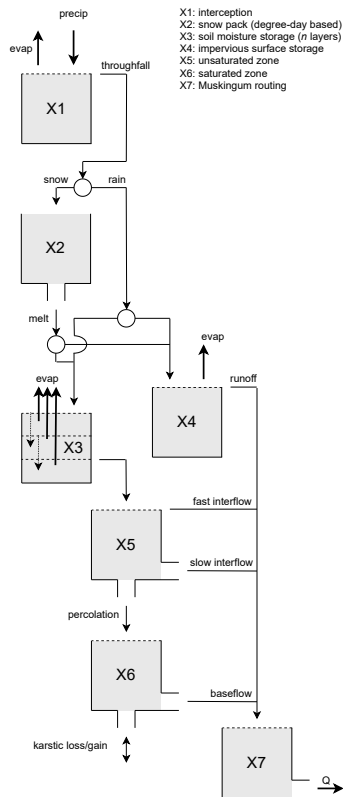

**Figure 4.** Fluxes: precipitation (precip), evapotranspiration (evap), throughfall, snow, rain, snowmelt (melt), runoff, fast interflow, slow interflow, percolation, baseflow, karstic loss/gain, simulated discharge (Q). Storage: Interception storage (X1), snow pack (X2), soil moisture storage (X3), impervious surface storage (X4), unsaturated zone (X5), saturated zone (X6), routing (X7).

## References

- Kumar, R., Samaniego, L., and Attinger, S.: The effects of spatial discretization and model parameterization on the prediction of extreme runoff characteristics, *Journal of Hydrology*, 392, 54–69, <https://doi.org/10.1016/j.jhydrol.2010.07.047>, 2010.
- Melsen, L., Addor, N., Mizukami, N., Newman, A., Torfs, P., Clark, M., Uijlenhoet, R., and Teuling, R.: Mapping (dis) agreement in hydrologic projections, *Hydrology and Earth System Sciences*, 22, 1775–1791, <https://doi.org/10.5194/hess-22-1775-2018>, 2018.
- Melsen, L. A. and Guse, B.: Hydrological drought simulations: How climate and model structure control parameter sensitivity, *Water Resources Research*, pp. 1–21, <https://doi.org/10.1029/2019wr025230>, 2019.
- National Weather Service NOAA: Conceptualization of the Sacramento Soil Moisture accounting model, Tech. rep., NOAA, [https://www.nws.noaa.gov/oh/hrl/nwsrfs/users\\_manual/part2/\\_pdf/23sacsma.pdf](https://www.nws.noaa.gov/oh/hrl/nwsrfs/users_manual/part2/_pdf/23sacsma.pdf), 2002.
- 25 Viglione, A. and Parajka, J.: TUWmodel: Lumped/Semi-Distributed Hydrological Model for Education Purposes, <https://cran.r-project.org/web/packages/TUWmodel/index.html>, 2020.
